# Supplementary material for: Facile one-pot synthesis and application of nitrogen and sulfur-doped activated graphene in simultaneous electrochemical determination of hydroquinone and catechol
Source: Royal Society of Chemistry journal article supplement (doi:10.1039/c6an00812g), 2016-01-01
Supplement: c6an00812g1.pdf [file c6an00812g1.pdf]

## Electronic Supplementary Information

### Facile one-pot synthesis and application of nitrogen, sulfur-doped activated graphene in simultaneous electrochemical determination of hydroquinone and catechol

Lili Xiao<sup>a,b</sup>, Jiao Yin<sup>a</sup>, Yingchun Li<sup>c</sup>, Qunhui Yuan<sup>d,a,\*</sup>, Hangjia Shen<sup>a,b</sup>, Guangzhi Hu<sup>a,\*</sup>, Wei Gan<sup>d,a,\*</sup>

<sup>a</sup> Laboratory of Environmental Science and Technology, The Xinjiang Technical Institute of Physics and Chemistry; Key Laboratory of Functional Materials and Devices for Special Environments, Chinese Academy of Sciences, Urumqi 830011, China.

<sup>b</sup> University of Chinese Academy of Sciences, Beijing, 100049, China.

<sup>c</sup> Key Laboratory for Green Processing of Chemical Engineering of Xinjiang Bingtuan, School of Chemistry and Chemical Engineering, Shihezi University, Shihezi 832003, China

<sup>d</sup> School of Materials Science and Engineering, Harbin Institute of Technology, Shenzhen 518055, China.

\*Corresponding author. Tel.: +86-991-3677875; fax: +86-991-3838957

E-mail address: yuanqunhui@hitsz.edu.cn (Q. Yuan), guangzhihu@ms.xjb.ac.cn (G. Hu) and ganwei@hitsz.edu.cn (W. Gan)

## 1. The optimal conditions

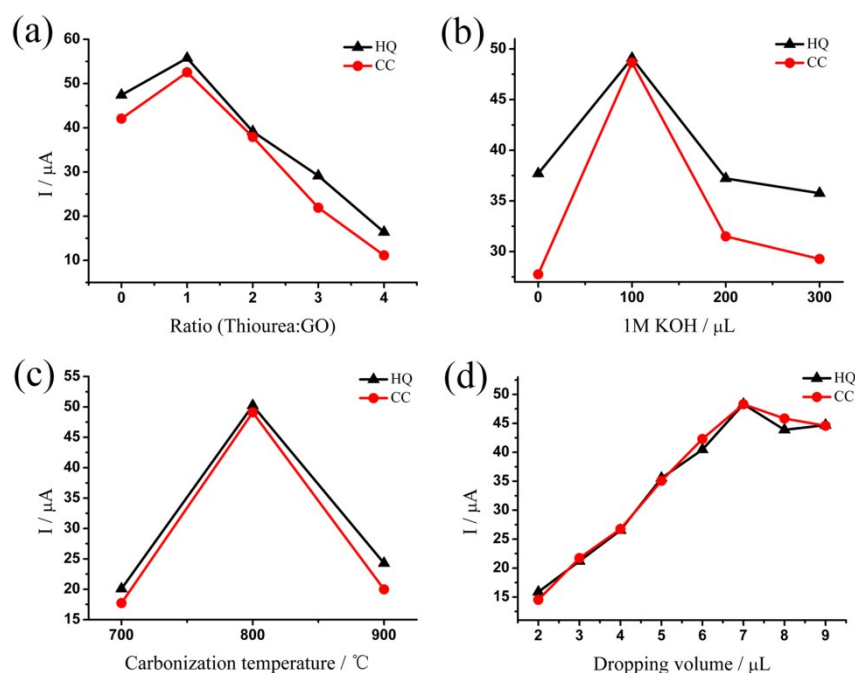

Fig. S1 Influence of (a) ratio of thiourea and GO, (b) amount of KOH, (c) carbonization temperature and (d) volume of N,S-AGR-DMF suspension on the peak currents of 50  $\mu\text{M}$  HQ and CC in 0.1 M HAC-NaAc (pH=5.0) at N,S-AGR/GCE.

## 2. Evaluation on the thickness of the modified electrode

Here we evaluated the thickness of N,S-AGR modified on GCE according to an

equation of 
$$l = \frac{m}{\pi R^2 d}$$
 reported by Kefala et al.,<sup>1</sup> assuming a uniform distribution of the N,S-AGR modifying film on the electrode surface. In the equation,  $l$  is the thickness of N,S-AGR modifier,  $m$  is the mass of the N,S-AGR modifier coated on the electrode surface (7  $\mu\text{g}$  in this work),  $R$  is the radius of glassy carbon electrode (1.5 mm in this work),  $d$  is the density of the N,S-AGR. In our work  $d$  was measured to be 0.1106  $\text{g cm}^{-3}$ , as indicated in the follow Scheme S1.

Based on the above equation, the thickness of the present N,S-AGR/GCE is about 9.0  $\mu\text{m}$ .

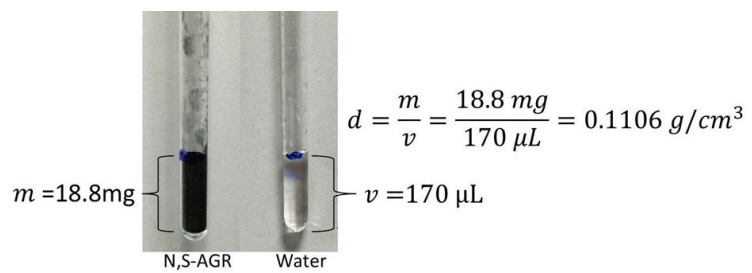

Scheme S1. The setup used to get the density of the N,S-AGR.

### Reference

1. G. Kefala, A. Economou and A. Voulgaropoulos, *Analyst*, 2004, **129**, 1082-1090.
